# Supplementary material for: A slow-cycling/quiescent cells subpopulation is involved in glioma invasiveness
Source: PubMed Central journal article supplement (PMC9378633; doi:10.1038/s41467-022-32448-0), 2022-08-15
Supplement: 41467_2022_32448_MOESM2_ESM.pdf [file 41467_2022_32448_MOESM2_ESM.pdf]

## Description of Additional Supplementary Files

File Name: Supplementary Movie 1

Description: **3D projection of infiltrating qProm1 in mouse TP tumors.**

Z-stack of TP-Cherry<sup>+</sup> (red)/Prom1-Venus-p27<sup>+</sup> (green) expressing cells in the infiltrating edge of TP-induced tumors in mouse brains.

File Name: Supplementary Movie 2

Description: **3D projection of infiltrating quiescent cells derived from TP-Cherry/Venus-p27 organoids transplanted in nude mice brain.**

Z-stack of TP-Cherry<sup>+</sup> (red)/CAG-Venus-p27<sup>+</sup> (green) expressing cells in the infiltrating edge of TP organoid-derived tumors in mouse brains.

File Name: Supplementary Data 1

Description: differential analysis between pediatric malignant non-cycling PROM1<sup>+</sup> cells (PROM1<sup>+</sup>) and pediatric malignant non-cycling PROM1<sup>-</sup> cells (PROM1<sup>-</sup>).

File Name: Supplementary Data 2

Description: differential analysis between pediatric malignant non-cycling PROM1<sup>+</sup> cells (non-cycling) and pediatric malignant cycling PROM1<sup>+</sup> cells (cycling).
